# Supplementary material for: Irrelevant auditory and tactile signals, but not visual signals, interact with the target onset and modulate saccade latencies
Source: PLoS One. 2020 Feb 11;15(2):e0221192. doi: 10.1371/journal.pone.0221192 (PMC7012454; doi:10.1371/journal.pone.0221192)
Supplement: S3 Table — (XLSX) [file pone.0221192.s003.xlsx]

## Sheet: Comparing experiments stats
Condition	-240ms	-120ms	-60ms	-30ms	+0ms	+30ms	+60ms	+120ms	+240ms
Experiment B vs. Experiment A (baseline: No beep)
Mean n-score (B)			-1.78		-1.47		0.47
Mean n-score (A)			-1.65		-1.32		0.65
Variance (Levene)			w=9.93; p=0.0084		w=0.04; p=0.8456		w=2.11; p=0.1718
t-test			t(7)=-0.53; p=0.6034		t(7)=-0.52; p=0.6102		t(7)=-0.48; p=0.6394
Effect size (Cohen)			d=0.29		d=0.28		d=0.26
Significance
Experiment C vs. Experiment A (baseline: No signal)
Mean n-score (C)	-0.52	-1.05	-0.77	0.92	-0.17	1.26	1.84	-0.03	-0.06
Mean n-score (A)	-1.84	-2	-1.65	-1.49	-1.32	-0.41	0.65	0.38	0.01
Variance (Levene)	w=1.54; p=0.2356	w=4.63; p=0.0493	w=9.98; p=0.0070	w=10.43; p=0.0061	w=0.16; p=0.6952	w=0.53; p=0.4798	w=2.08; p=0.1713	w=0.46; p=0.5098	w=0.68; p=0.4239
t-test	t(7)=4.59; p=0.0004	t(7)=3.68; p=0.0025	t(7)=3.15; p=0.0070	t(7)=5.05; p=0.0002	t(7)=3.69; p=0.0024	t(7)=6.22; p=0.0000	t(7)=5.14; p=0.0002	t(7)=-2.31; p=0.0364	t(7)=-0.42; p=0.6839
Effect size (Cohen)	d=2.30	d=1.84	d=1.58	d=2.52	d=1.85	d=3.11	d=2.57	d=1.16	d=0.21
Significance	***	***	**	***	***	***	***	*
Experiment D vs. Experiment C (baseline: No flash)
Mean n-score (D)	0.01	0	0.25	0.47	-1.7	1.43	0.97	0.18	-0.06
Mean n-score (C)	-0.52	-1.05	-0.77	0.92	-0.17	1.26	1.84	-0.03	-0.06
Variance (Levene)	w=1.41; p=0.2629	w=1.12; p=0.3147	w=0.24; p=0.6322	w=0.09; p=0.7728	w=0.00; p=0.9892	w=1.40; p=0.2637	w=4.12; p=0.0699	w=0.34; p=0.5740	w=1.27; p=0.2865
t-test	t(7)=0.98; p=0.3493	t(7)=2.34; p=0.0411	t(7)=2.15; p=0.0573	t(7)=-0.58; p=0.5720	t(7)=-3.52; p=0.0055	t(7)=0.49; p=0.6372	t(7)=-2.23; p=0.0497	t(7)=0.78; p=0.4558	t(7)=0.02; p=0.9873
Effect size (Cohen)	d=0.60	d=1.44	d=1.31	d=0.36	d=2.16	d=0.30	d=1.37	d=0.48	d=0.01
Significance		*			***		*
Experiment E vs. Experiment A (baseline: No signal)
Mean n-score (E)	-2.19	-1.9	-1.22	-0.81	-0.43	0.32	0.47	0.07	0.31
Mean n-score (A)	-1.84	-2	-1.65	-1.49	-1.32	-0.41	0.65	0.38	0.01
Variance (Levene)	w=1.93; p=0.1867	w=3.53; p=0.0812	w=16.22; p=0.0012	w=5.38; p=0.0360	w=0.54; p=0.4731	w=3.85; p=0.0701	w=0.52; p=0.4834	w=1.29; p=0.2751	w=5.00; p=0.0421
t-test	t(7)=-1.17; p=0.2603	t(7)=0.34; p=0.7414	t(7)=1.46; p=0.1651	t(7)=1.89; p=0.0795	t(7)=2.90; p=0.0117	t(7)=1.59; p=0.1339	t(7)=-0.61; p=0.5497	t(7)=-1.24; p=0.2360	t(7)=1.06; p=0.3052
Effect size (Cohen)	d=0.59	d=0.17	d=0.73	d=0.95	d=1.45	d=0.80	d=0.31	d=0.62	d=0.53
Significance					*
